# Supplementary material for: Thermal Degradation and Carbonization Mechanism of Fe-Based Metal-Organic Frameworks onto Flame-Retardant Polyethylene Terephthalate
Source: MDPI journal article supplement (doi:10.3390/polym15010224), 2023-01-01
Supplement: s1 [file s1]

# Supporting information

## Thermal degradation and carbonization mechanism of Fe-based metal-organic frameworks onto flame retardant polyethylene terephthalate

Tianyi Ma <sup>1</sup>, Wenqing Wang <sup>1,2,\*</sup>, Rui Wang <sup>1,2,\*</sup>

<sup>1</sup> Materials Design & Engineering Department, Beijing Institute of Fashion Technology, Beijing 100029, China;

<sup>2</sup> Beijing Key Laboratory of Clothing Materials R&D and Assessment, Beijing Engineering Research Center of Textile Nanofiber, Beijing Institute of Fashion Technology, Beijing 100029, China;

\* Correspondence: Wenqing Wang, 20180021@bift.edu.cn; Rui Wang, clywangrui@bift.edu.cn

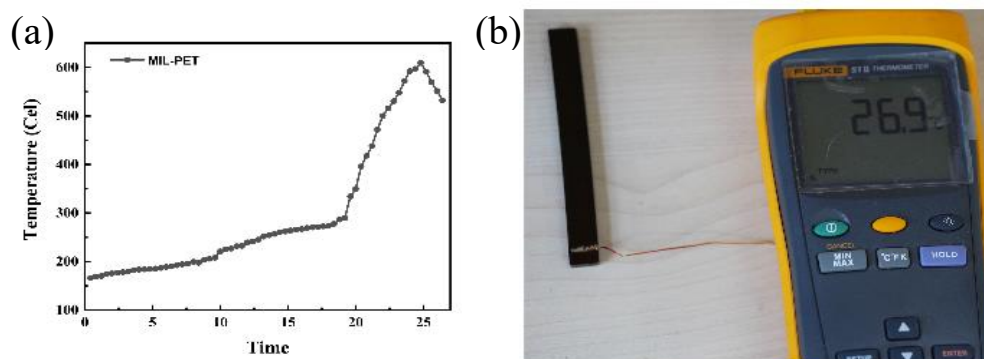

**Figure S1.** (a) Temperature changes vs. combustion time of MIL-PET in LOI test and (b) its measurement setup

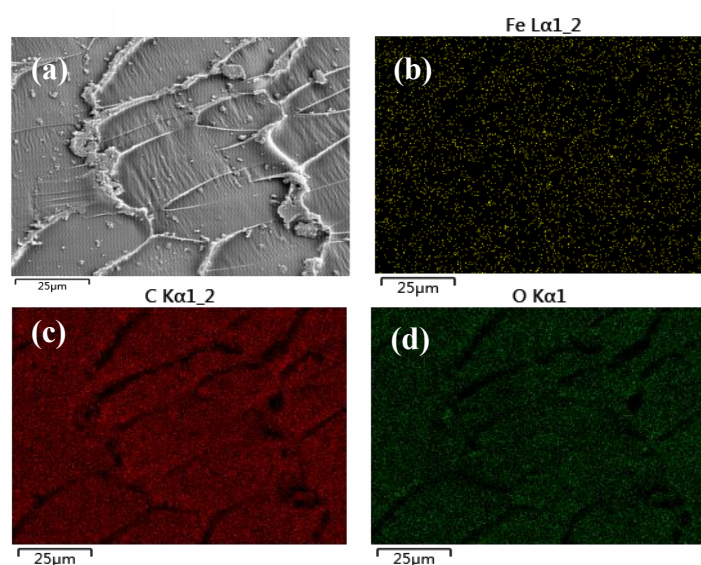

**Figure S2.** SEM image (a) and element mapping images (b-d) for 0.6 MIL-PET

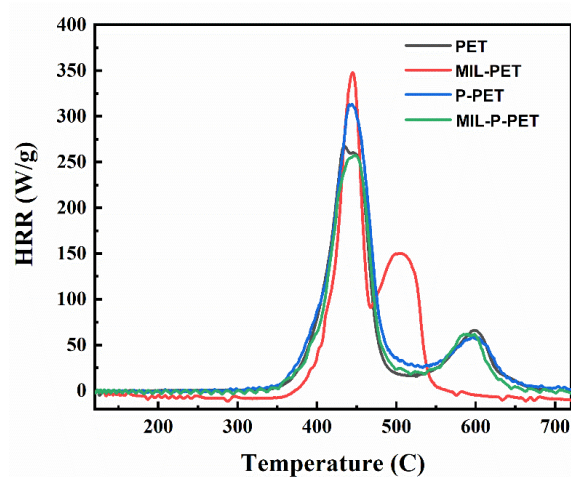

**Figure S3.** The micro cone calorimeter curves of PET, MIL-PET, P-PET, MIL-P-PET

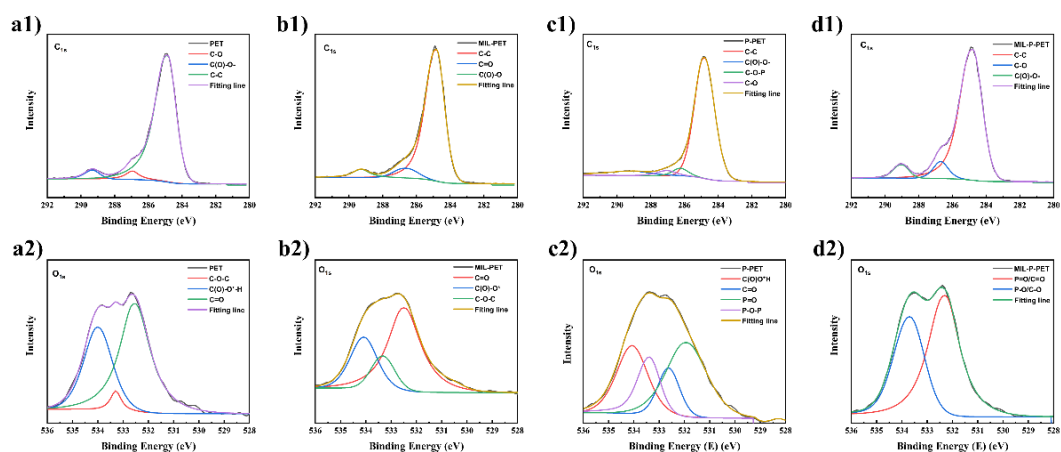

**Figure S4.** C1s and O1s of X-ray photoelectron spectroscopy and its fitted lines of char residue of PET a1-a2), MIL-PET b1-b2), P-PET c1-c2), MIL-P-PET d1-d2)

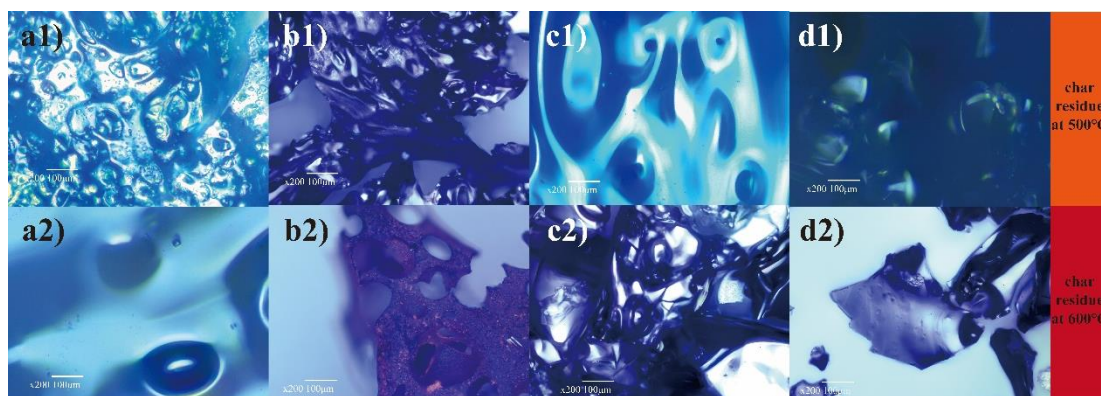

**Figure S5.** Optical microscope of PET a1-a2), MIL-PET b1-b2), P-PET c1-c2) and MIL-P-PET d1-d2) at 500 and 600 °C

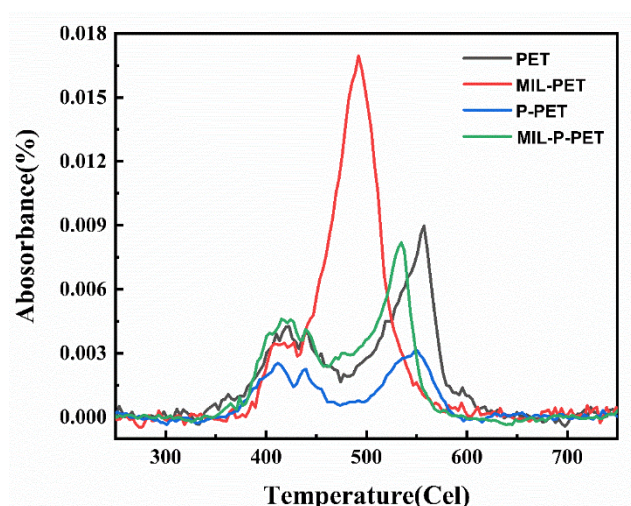

Figure S6. FTIR spectra at 3750 cm<sup>-1</sup> of PET, MIL-PET, P-PET and MIL-P-PET at different temperature.

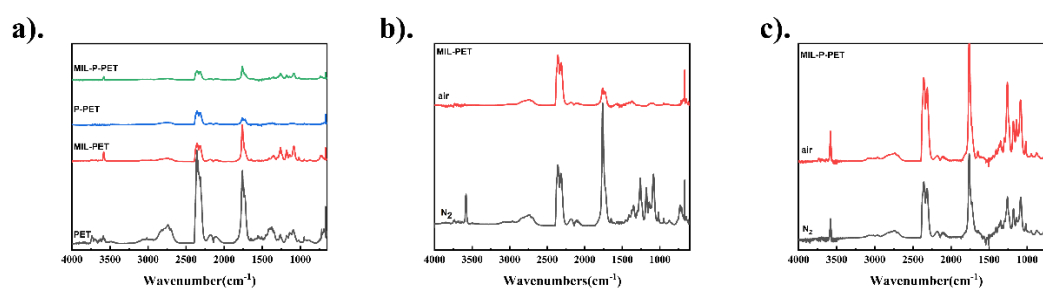

Figure S7. The TG-FTIR spectra of the highest concentration of PET, MIL-PET, P-PET, and MIL-P-PET in N<sub>2</sub> atmosphere (a). and the contrast between the first step degradation in air and highest concentration in N<sub>2</sub> atmosphere of MIL-PET (b) and MIL-P-PET (c).

Table S1. Raman results of PET, 0.2MIL-PET, 0.6MIL-PET, P-PET, 0.6MIL-P-PET

| Sample    | $I_D(\times 10^5)$ | $I_{D4}(\times 10^5)$ | $I_{D3}(\times 10^5)$ | $I_G(\times 10^5)$ | $I_{D3}/I_G$ | $(I_{D3}+I_{D4})/I_G$ | $I_D/I_G$ |
|-----------|--------------------|-----------------------|-----------------------|--------------------|--------------|-----------------------|-----------|
| PET       | 16.52              | 1.703                 | 6.026                 | 8.228              | 0.73         | 0.94                  | 2.01      |
| MIL-PET   | 9.232              | 1.827                 | 3.820                 | 6.064              | 0.63         | 0.93                  | 1.52      |
| P-PET     | 10.42              | 1.349                 | 3.990                 | 5.501              | 0.72         | 0.97                  | 1.89      |
| MIL-P-PET | 7.024              | 1.046                 | 3.21                  | 4.588              | 0.70         | 0.93                  | 1.53      |
